# Supplementary material for: A deep decarbonization framework for the United States economy – a sector, sub-sector, and end-use based approach
Source: Royal Society of Chemistry journal article supplement (doi:10.1039/d3se00807j), 2024-01-01

## Supplementary Information

### A Deep Decarbonization Scenario for the United States Economy – a Sector, Sub-Sector, and End-use based approach

Saurajyoti Kar<sup>1</sup>, Troy Hawkins<sup>1\*</sup>, George G. Zaines<sup>1</sup>, Doris Oke<sup>1,2</sup>, Xinyi Wu<sup>1</sup>, Hoyoung Kwon<sup>1</sup>, Udayan Singh<sup>1</sup>, Shannon Zhang<sup>1</sup>, Guiyan Zang<sup>1</sup>, Yan Zhou<sup>1</sup>, Amgad Elgowainy<sup>1</sup>, Michael Wang<sup>1</sup>, Ookie Ma<sup>3</sup>

<sup>1</sup> Argonne National Laboratory

<sup>2</sup> Northwestern University

<sup>3</sup> Office of Energy Efficiency and Renewable Energy, U.S. Department of Energy

\*Correspondence author:

thawkins@anl.gov

**Table SI-1:** Data for Figure 2, reference case economy-wide GHG emissions by sector, million metric tons CO<sub>2</sub><sub>e</sub> per year.

|      | Transportation | Industrial | Waste | Commercial | Residential | Agriculture | LULUCF | Net Economy-Wide |
|------|----------------|------------|-------|------------|-------------|-------------|--------|------------------|
| 2020 | 1,720          | 1,819      | 164   | 822        | 996         | 713         | (790)  | 5,444            |
| 2021 | 1,824          | 1,831      | 164   | 864        | 1,024       | 718         | (790)  | 5,635            |
| 2022 | 1,868          | 1,861      | 164   | 882        | 1,040       | 724         | (790)  | 5,750            |
| 2023 | 1,875          | 1,862      | 164   | 855        | 994         | 724         | (790)  | 5,683            |
| 2024 | 1,875          | 1,860      | 164   | 826        | 949         | 723         | (790)  | 5,606            |
| 2025 | 1,871          | 1,872      | 164   | 814        | 924         | 723         | (790)  | 5,577            |
| 2026 | 1,862          | 1,896      | 164   | 825        | 935         | 725         | (790)  | 5,615            |
| 2027 | 1,851          | 1,897      | 164   | 816        | 926         | 726         | (790)  | 5,589            |
| 2028 | 1,843          | 1,904      | 164   | 814        | 924         | 727         | (790)  | 5,585            |
| 2029 | 1,834          | 1,912      | 164   | 813        | 923         | 728         | (790)  | 5,584            |
| 2030 | 1,828          | 1,916      | 164   | 803        | 915         | 729         | (790)  | 5,565            |
| 2031 | 1,821          | 1,923      | 164   | 799        | 911         | 730         | (790)  | 5,556            |
| 2032 | 1,816          | 1,925      | 164   | 794        | 907         | 731         | (790)  | 5,547            |
| 2033 | 1,814          | 1,930      | 164   | 794        | 907         | 732         | (790)  | 5,550            |
| 2034 | 1,813          | 1,939      | 164   | 794        | 907         | 733         | (790)  | 5,559            |
| 2035 | 1,813          | 1,941      | 164   | 786        | 899         | 734         | (790)  | 5,547            |
| 2036 | 1,813          | 1,948      | 164   | 786        | 900         | 735         | (790)  | 5,556            |
| 2037 | 1,813          | 1,954      | 164   | 786        | 900         | 736         | (790)  | 5,563            |
| 2038 | 1,815          | 1,959      | 164   | 784        | 899         | 737         | (790)  | 5,567            |
| 2039 | 1,818          | 1,967      | 164   | 786        | 901         | 738         | (790)  | 5,584            |
| 2040 | 1,821          | 1,974      | 164   | 790        | 905         | 740         | (790)  | 5,604            |
| 2041 | 1,827          | 1,981      | 164   | 791        | 906         | 741         | (790)  | 5,619            |
| 2042 | 1,834          | 1,994      | 164   | 794        | 909         | 742         | (790)  | 5,648            |
| 2043 | 1,843          | 2,008      | 164   | 797        | 912         | 744         | (790)  | 5,676            |
| 2044 | 1,852          | 2,017      | 164   | 799        | 914         | 745         | (790)  | 5,701            |
| 2045 | 1,861          | 2,023      | 164   | 799        | 912         | 746         | (790)  | 5,715            |
| 2046 | 1,870          | 2,032      | 164   | 801        | 913         | 747         | (790)  | 5,736            |
| 2047 | 1,878          | 2,041      | 164   | 804        | 914         | 748         | (790)  | 5,759            |
| 2048 | 1,887          | 2,052      | 164   | 809        | 919         | 750         | (790)  | 5,791            |
| 2049 | 1,897          | 2,064      | 164   | 814        | 923         | 751         | (790)  | 5,822            |
| 2050 | 1,906          | 2,077      | 164   | 819        | 926         | 753         | (790)  | 5,854            |

**Table SI-2:** Data for Figure 3, decarbonization scenario economy-wide GHG emissions by sector, million metric tons CO<sub>2</sub>e per year.

|      | <i>Transportation</i> | Industrial | Waste | Commercial | Residential | Agriculture | LULUCF | Net Economy-Wide |
|------|-----------------------|------------|-------|------------|-------------|-------------|--------|------------------|
| 2020 | 1,600                 | 1,839      | 164   | 836        | 1,017       | 711         | (790)  | 5,376            |
| 2021 | 1,696                 | 1,872      | 164   | 902        | 1,075       | 702         | (797)  | 5,614            |
| 2022 | 1,740                 | 1,833      | 164   | 803        | 960         | 686         | (804)  | 5,382            |
| 2023 | 1,746                 | 1,822      | 164   | 752        | 892         | 670         | (811)  | 5,234            |
| 2024 | 1,747                 | 1,814      | 164   | 713        | 839         | 653         | (817)  | 5,113            |
| 2025 | 1,739                 | 1,796      | 164   | 659        | 769         | 636         | (824)  | 4,938            |
| 2026 | 1,723                 | 1,759      | 164   | 586        | 683         | 617         | (831)  | 4,702            |
| 2027 | 1,703                 | 1,707      | 164   | 511        | 592         | 598         | (838)  | 4,438            |
| 2028 | 1,679                 | 1,654      | 152   | 437        | 500         | 578         | (844)  | 4,157            |
| 2029 | 1,642                 | 1,598      | 133   | 365        | 408         | 558         | (851)  | 3,853            |
| 2030 | 1,597                 | 1,549      | 104   | 310        | 336         | 539         | (858)  | 3,578            |
| 2031 | 1,543                 | 1,526      | 78    | 302        | 321         | 524         | (860)  | 3,433            |
| 2032 | 1,471                 | 1,484      | 78    | 293        | 306         | 509         | (845)  | 3,297            |
| 2033 | 1,378                 | 1,430      | 78    | 284        | 290         | 493         | (837)  | 3,116            |
| 2034 | 1,261                 | 1,365      | 79    | 270        | 273         | 476         | (844)  | 2,880            |
| 2035 | 1,148                 | 1,300      | 80    | 257        | 251         | 460         | (852)  | 2,645            |
| 2036 | 1,034                 | 1,237      | 81    | 252        | 237         | 445         | (854)  | 2,432            |
| 2037 | 934                   | 1,172      | 77    | 247        | 224         | 429         | (850)  | 2,233            |
| 2038 | 837                   | 1,110      | 72    | 243        | 212         | 414         | (847)  | 2,041            |
| 2039 | 749                   | 1,088      | 66    | 239        | 203         | 398         | (871)  | 1,872            |
| 2040 | 670                   | 1,047      | 60    | 236        | 198         | 382         | (874)  | 1,720            |
| 2041 | 596                   | 1,009      | 51    | 232        | 193         | 367         | (875)  | 1,573            |
| 2042 | 528                   | 981        | 50    | 230        | 189         | 351         | (878)  | 1,452            |
| 2043 | 472                   | 957        | 50    | 227        | 181         | 335         | (885)  | 1,339            |
| 2044 | 414                   | 930        | 49    | 225        | 174         | 319         | (891)  | 1,220            |
| 2045 | 358                   | 904        | 52    | 221        | 168         | 303         | (898)  | 1,108            |
| 2046 | 311                   | 877        | 50    | 217        | 161         | 286         | (906)  | 998              |
| 2047 | 268                   | 803        | 52    | 213        | 155         | 267         | (870)  | 889              |
| 2048 | 264                   | 789        | 52    | 210        | 149         | 252         | (885)  | 831              |
| 2049 | 259                   | 774        | 51    | 206        | 142         | 237         | (897)  | 773              |
| 2050 | 256                   | 762        | 51    | 202        | 137         | 222         | (905)  | 725              |

**Table SI-3:** Data for Figure 5, GHG reduction contributions from electric power decarbonization, million metric tons CO<sub>2</sub><sub>e</sub> per year.

|      | Transportation | Industrial | Commercial | Residential | Agriculture |
|------|----------------|------------|------------|-------------|-------------|
| 2020 | (0.2)          | (14.0)     | (21.9)     | (25.4)      | (1.2)       |
| 2021 | (0.5)          | (29.8)     | (48.3)     | (55.6)      | (2.8)       |
| 2022 | 0.6            | 37.0       | 59.1       | 66.7        | 3.5         |
| 2023 | 0.8            | 46.2       | 73.2       | 81.6        | 4.4         |
| 2024 | 0.9            | 47.6       | 75.3       | 83.0        | 4.5         |
| 2025 | 1.5            | 71.0       | 111.8      | 121.7       | 6.7         |
| 2026 | 2.8            | 123.0      | 192.1      | 209.7       | 11.8        |
| 2027 | 4.1            | 165.9      | 257.7      | 281.9       | 16.0        |
| 2028 | 5.7            | 212.5      | 329.4      | 361.4       | 20.7        |
| 2029 | 7.4            | 259.8      | 401.8      | 442.1       | 25.6        |
| 2030 | 8.9            | 289.9      | 445.6      | 492.6       | 28.7        |
| 2031 | 9.6            | 289.3      | 442.7      | 491.3       | 28.9        |
| 2032 | 10.4           | 287.0      | 439.7      | 489.5       | 28.9        |
| 2033 | 11.3           | 287.3      | 440.9      | 492.3       | 29.3        |
| 2034 | 12.3           | 288.8      | 443.0      | 496.2       | 29.7        |
| 2035 | 13.2           | 287.7      | 442.0      | 496.4       | 29.9        |
| 2036 | 14.3           | 287.3      | 442.6      | 498.5       | 30.1        |
| 2037 | 15.4           | 286.1      | 442.2      | 499.4       | 30.3        |
| 2038 | 16.5           | 284.6      | 440.9      | 499.1       | 30.4        |
| 2039 | 17.8           | 285.1      | 442.9      | 502.3       | 30.7        |
| 2040 | 19.2           | 285.9      | 446.6      | 507.1       | 31.1        |
| 2041 | 20.6           | 285.8      | 447.8      | 508.7       | 31.3        |
| 2042 | 22.0           | 288.0      | 451.1      | 512.7       | 31.7        |
| 2043 | 23.4           | 289.3      | 453.7      | 515.4       | 32.0        |
| 2044 | 24.9           | 289.8      | 456.3      | 518.2       | 32.3        |
| 2045 | 26.1           | 288.1      | 456.1      | 517.4       | 32.4        |
| 2046 | 27.4           | 287.3      | 457.6      | 518.4       | 32.5        |
| 2047 | 28.8           | 287.2      | 460.7      | 520.8       | 32.8        |
| 2048 | 30.4           | 288.6      | 466.2      | 525.8       | 33.2        |
| 2049 | 32.0           | 290.1      | 471.8      | 530.6       | 33.7        |
| 2050 | 33.5           | 291.1      | 476.7      | 534.5       | 34.0        |

**Table SI-4:** Data for Figure 5, GHG reduction contributions from biofuels-based decarbonization, million metric tons CO<sub>2</sub>e per year.

|      | Transportation | Industrial | Waste | Commercial | Residential | Agriculture | LULUCF  |
|------|----------------|------------|-------|------------|-------------|-------------|---------|
| 2020 | 49.4           | (3.4)      | -     | 8.1        | 4.2         | 3.5         | -       |
| 2021 | 56.9           | (3.7)      | -     | 10.1       | 5.3         | 4.3         | -       |
| 2022 | 55.1           | (3.4)      | -     | 10.0       | 5.1         | 4.2         | -       |
| 2023 | 56.9           | (3.4)      | -     | 10.4       | 5.0         | 4.3         | -       |
| 2024 | 58.0           | (3.5)      | -     | 10.4       | 4.7         | 4.2         | -       |
| 2025 | 59.7           | (3.7)      | -     | 10.3       | 4.3         | 4.1         | -       |
| 2026 | 61.4           | (4.0)      | -     | 10.3       | 4.0         | 4.0         | -       |
| 2027 | 63.6           | (4.6)      | -     | 10.2       | 3.8         | 3.8         | -       |
| 2028 | 66.6           | (5.4)      | 6.4   | 10.0       | 3.5         | 3.7         | -       |
| 2029 | 71.0           | (6.8)      | 17.3  | 9.8        | 3.2         | 3.5         | -       |
| 2030 | 77.8           | (9.0)      | 33.1  | 9.6        | 2.9         | 3.3         | -       |
| 2031 | 89.3           | (10.0)     | 47.6  | 9.4        | 2.7         | 3.2         | (4.3)   |
| 2032 | 112.5          | (4.6)      | 47.5  | 10.1       | 2.6         | 3.4         | (26.5)  |
| 2033 | 153.2          | 5.1        | 47.2  | 11.1       | 2.7         | 3.8         | (41.0)  |
| 2034 | 216.5          | 17.2       | 46.9  | 15.1       | 3.3         | 5.2         | (40.6)  |
| 2035 | 272.4          | 17.7       | 46.5  | 15.6       | 3.1         | 5.5         | (40.1)  |
| 2036 | 320.4          | 11.9       | 46.0  | 16.0       | 2.8         | 5.8         | (44.7)  |
| 2037 | 352.8          | 10.5       | 47.8  | 16.4       | 2.5         | 6.0         | (54.9)  |
| 2038 | 382.6          | 9.9        | 50.6  | 17.0       | 2.3         | 6.2         | (65.4)  |
| 2039 | 407.3          | (20.6)     | 54.0  | 17.5       | 2.0         | 6.4         | (47.6)  |
| 2040 | 426.3          | (24.3)     | 57.4  | 18.0       | 1.9         | 6.6         | (52.1)  |
| 2041 | 441.5          | (24.5)     | 62.6  | 18.6       | 1.9         | 7.0         | (58.0)  |
| 2042 | 453.4          | (27.7)     | 62.7  | 18.9       | 1.8         | 7.3         | (61.5)  |
| 2043 | 460.5          | (30.4)     | 62.7  | 19.2       | 1.8         | 7.7         | (61.5)  |
| 2044 | 465.4          | (31.6)     | 63.3  | 19.5       | 1.7         | 8.4         | (61.9)  |
| 2045 | 467.7          | (33.4)     | 61.6  | 19.7       | 1.6         | 9.6         | (61.1)  |
| 2046 | 467.6          | (32.2)     | 62.7  | 20.1       | 1.5         | 11.2        | (60.8)  |
| 2047 | 463.9          | 16.1       | 61.9  | 20.3       | 1.4         | 14.6        | (104.3) |
| 2048 | 455.3          | 21.1       | 61.7  | 20.5       | 1.2         | 19.8        | (104.2) |
| 2049 | 438.5          | 30.6       | 62.5  | 20.9       | 1.0         | 29.3        | (104.7) |
| 2050 | 427.2          | 37.9       | 62.1  | 21.1       | 0.8         | 36.1        | (106.0) |

**TableSI-5:** List of correspondence files used for Decarbonization Model development.

| File Name                          | Sheet name           | Description                                                                                                                                                                                                                                                   |
|------------------------------------|----------------------|---------------------------------------------------------------------------------------------------------------------------------------------------------------------------------------------------------------------------------------------------------------|
| corr_EF_GREET.xlsx                 | corr_EF_GREET        | Mapping Decarbonization Model's sector, subsector, energy carrier, energy carrier type, end use application, and scope to GREET Pathway                                                                                                                       |
| corr_EF_GREET_SUPPLY_CHAIN.csv     | -                    | Similar to corr_EF_GREET, this maps supply chain emissions data                                                                                                                                                                                               |
| corr_EERE_SCOUT.xlsx               | Mapping EIA_to_Scout | Mapping EIA data classifications as per sector, subsector, end use application, energy carrier, energy carrier type to SCOUT's types and to SCOUT based mitigation case names                                                                                 |
| corr_ghgi_emissions_categories.csv | -                    | Categorizing EPA GHGI emission types to four primary categories: CO2, N2O, CH4, and fluorinated gases                                                                                                                                                         |
| corr_ghgi_sources_EERE.csv         | -                    | Mapping between EPA GHGI sector, and subsector to Decarbonization Model's sector, subsector and end use application                                                                                                                                           |
| corr_carbon_content_biofuels.csv   | -                    | Mapping biofuel energy carriers to their carbon content, in units of MMmt CO2 per MMBtu                                                                                                                                                                       |
| corr_EIA_EERE.csv                  | -                    | Mapping EIA data classifications as per sector, subsector, and end use application to Decarbonization Model conventions                                                                                                                                       |
| corr_EIA_energy_carrier.csv        | -                    | Mapping EIA data classifications as per energy carrier and energy carrier type to Decarbonization Model conventions                                                                                                                                           |
| corr_fuel_pool.csv                 | -                    | Mapping EIA data classifications as per energy carrier to new category classification, fuel pool, in Decarbonization Model                                                                                                                                    |
| corr_elec_gen.csv                  | -                    | Mapping electric power as sector and electricity as energy carrier type to electricity generation types                                                                                                                                                       |
| corr_vision.csv                    | -                    | Mapping VISION model's data classification as per sector, subsector, category end use application, powertrain, energy carrier, energy carrier type to Decarbonization Model's sector, subsector, end use application, energy carrier, and energy carrier type |
| corr_ghgi.csv                      | -                    | Correspondence table tracking EPA GHGI data file name to corresponding EPA GHGI report table number, inventory sector, category, chapter, and description                                                                                                     |
| corr_EF_GREET_EIA.csv              | -                    | Mapping EIA energy carrier and energy carrier type to GREET's fuel and fuel type                                                                                                                                                                              |

**Table SI-6:** List of Economic Sectors, Economic Subsectors, Mitigation case names and their descriptions.

| Mitigation Case                                                  | Economic Sector | Economic Sub-sector            | Description                                                                                                             |
|------------------------------------------------------------------|-----------------|--------------------------------|-------------------------------------------------------------------------------------------------------------------------|
| Biofuels, Changes in Above C stock                               | LULUCF          | Changes in Aboveground C stock | Change in aboveground carbon based on the type of biofuel in use                                                        |
| Biofuels, Diesel                                                 | Agriculture     | -                              | Fractional replacement of conventional fossil fuel-based diesel using biofuels for the various sectors and subsectors   |
|                                                                  | Commercial      | -                              |                                                                                                                         |
|                                                                  | Industrial      | Aluminum Industry              |                                                                                                                         |
|                                                                  | Industrial      | Bulk Chemical Industry         |                                                                                                                         |
|                                                                  | Industrial      | Cement and Lime Industry       |                                                                                                                         |
|                                                                  | Industrial      | Food Industry                  |                                                                                                                         |
|                                                                  | Industrial      | Glass Industry                 |                                                                                                                         |
|                                                                  | Industrial      | Iron and Steel Industry        |                                                                                                                         |
|                                                                  | Industrial      | Metal Based Durables Industry  |                                                                                                                         |
|                                                                  | Industrial      | Nonmanufacturing Sector        |                                                                                                                         |
|                                                                  | Industrial      | Other Manufacturing Industry   |                                                                                                                         |
|                                                                  | Industrial      | Paper Industry                 |                                                                                                                         |
|                                                                  | Industrial      | Refining Industry              |                                                                                                                         |
|                                                                  | Residential     | -                              |                                                                                                                         |
|                                                                  | Transportation  | Marine                         |                                                                                                                         |
|                                                                  | Transportation  | Military                       |                                                                                                                         |
|                                                                  | Transportation  | On Road                        |                                                                                                                         |
| Transportation                                                   | Rail            |                                |                                                                                                                         |
| Biofuels, Gasoline                                               | Agriculture     | -                              | Fractional replacement of conventional fossil fuel-based gasoline using biofuels for the various sectors and subsectors |
|                                                                  | Industrial      | Nonmanufacturing Sector        |                                                                                                                         |
|                                                                  | Transportation  | Marine                         |                                                                                                                         |
|                                                                  | Transportation  | On Road                        |                                                                                                                         |
| Biofuels, Reduction in Fugitive Methane Emissions from Landfills | Waste           | Landfills                      | Fractional collection and use of landfills produced methane for methane mitigation                                      |
| Biofuels, SAF                                                    | Transportation  | Aviation                       | Biofuels used as sustainable aviation fuels, replacing fraction of conventional jet fuels                               |
|                                                                  | Transportation  | Military                       |                                                                                                                         |
| Biofuels, SOC Change                                             | LULUCF          | Cropland Remaining Cropland    | Change in belowground soil carbon due to change in production of energy crops, those are converted to biofuels          |
| Bulk Chemical Industry, efficiency improvements                  | Industrial      | Bulk Chemical Industry         | Efficiency improvement in existing infrastructures applied annually over time for bulk                                  |

|                                                                            |            |                          |                                                                                                                                       |
|----------------------------------------------------------------------------|------------|--------------------------|---------------------------------------------------------------------------------------------------------------------------------------|
|                                                                            |            |                          | chemical industries                                                                                                                   |
| Bulk Chemical Industry, fuel switching for low quality heat to Electricity | Industrial | Bulk Chemical Industry   | Fraction of all fuels used for producing low quality heat is converted to electricity use over time for the bulk chemical industry    |
| Bulk Chemical Industry, fuel switching Steam Coal to Natural Gas           | Industrial | Bulk Chemical Industry   | Fraction of steam coal used in the bulk chemical industry is converted to the use of natural gas                                      |
| Bulk Chemical Industry, Green Ammonia                                      | Industrial | Bulk Chemical Industry   | Fraction of conventional ammonia production is converted to green ammonia production over time                                        |
| Cement and Lime Industry, cement chemistry                                 | Industrial | Cement and Lime Industry | Improvement in efficiency in the cement production process by improving the production chemistry is implemented by fraction over time |
| Cement and Lime Industry, efficiency improvements                          | Industrial | Cement and Lime Industry | Efficiency improvement in conventional cement production methodology, applied as a fraction improvement over time                     |
| Cement and Lime Industry, fuel switching Fossil H2 to renewable H2         | Industrial | Cement and Lime Industry | Fraction of fossil based H2 used in the cement industry is now replaced with renewable H2 use over time                               |
| Cement and Lime Industry, fuel switching Natural Gas to Hydrogen           | Industrial | Cement and Lime Industry | Fraction of natural gas used in the cement industry is now replaced with H2 use over time                                             |
| Cement and Lime Industry, fuel switching Steam Coal to Natural Gas         | Industrial | Cement and Lime Industry | Fraction of steam coal used in the cement and lime industry is converted to the use of natural gas                                    |
| Commercial: Energy efficiency                                              | Commercial | -                        | Improvement in energy efficiency over time in the commercial sector                                                                   |
| Commercial: Energy efficiency of Fuel switching                            | Commercial | -                        | Improvement of efficiency in existing technologies over time in the commercial sector                                                 |
| Commercial: Fuel switching                                                 | Commercial | -                        | Improvement in the energy and GHG emissions performance of the commercial sector due to fuel switching mitigation implementation      |
| Food Industry, efficiency improvements                                     | Industrial | Food Industry            | Improvement in energy efficiency over time in the food sector                                                                         |
| Food Industry, fuel switching Fossil H2 to renewable H2                    | Industrial | Food Industry            | Fraction of natural gas use converted to the use of                                                                                   |



|                                                         |                |                               |                                                                                                                                                 |
|---------------------------------------------------------|----------------|-------------------------------|-------------------------------------------------------------------------------------------------------------------------------------------------|
|                                                         |                |                               | conventional H2 as a fuel switching mitigation measure                                                                                          |
| Food Industry, fuel switching Natural Gas to Hydrogen   | Industrial     | Food Industry                 | Fraction of conventional H2 replaced by green H2                                                                                                |
| Food Industry, fuel switching Steam Coal to Natural Gas | Industrial     | Food Industry                 | Fraction of steam coal use replaced with natural gas as a fuel switching mitigation measure                                                     |
| Global, fuel switching Fossil H2 to renewable H2        | Agriculture    | -                             | Implementing economy-wide fuel switching of converting fraction of conventional H2 to renewable H2 across the different sectors and sub-sectors |
|                                                         | Commercial     | -                             |                                                                                                                                                 |
|                                                         | Industrial     | Aluminum Industry             |                                                                                                                                                 |
|                                                         | Industrial     | Glass Industry                |                                                                                                                                                 |
|                                                         | Industrial     | Metal Based Durables Industry |                                                                                                                                                 |
|                                                         | Industrial     | Nonmanufacturing Sector       |                                                                                                                                                 |
|                                                         | Industrial     | Other Manufacturing Industry  |                                                                                                                                                 |
|                                                         | Residential    | -                             |                                                                                                                                                 |
|                                                         | Transportation | On Road                       |                                                                                                                                                 |
|                                                         | Transportation | Other                         |                                                                                                                                                 |
| Global, fuel switching Natural Gas to Hydrogen          | Agriculture    | -                             | Implementing economy wide fuel switching of converting fraction of natural gas use to hydrogen across the different sectors and sub-sectors     |
|                                                         | Commercial     | -                             |                                                                                                                                                 |
|                                                         | Industrial     | Aluminum Industry             |                                                                                                                                                 |
|                                                         | Industrial     | Glass Industry                |                                                                                                                                                 |
|                                                         | Industrial     | Metal Based Durables Industry |                                                                                                                                                 |
|                                                         | Industrial     | Nonmanufacturing Sector       |                                                                                                                                                 |
|                                                         | Industrial     | Other Manufacturing Industry  |                                                                                                                                                 |
|                                                         | Residential    | -                             |                                                                                                                                                 |
|                                                         | Transportation | Other                         |                                                                                                                                                 |
| Global, fuel switching Steam Coal to Natural Gas        | Agriculture    | -                             | Implement economy wide fuel switching of converting fraction of steam coal to natural gas across the different sectors and sub-sectors          |
|                                                         | Industrial     | Aluminum Industry             |                                                                                                                                                 |
|                                                         | Industrial     | Glass Industry                |                                                                                                                                                 |
|                                                         | Industrial     | Metal Based Durables Industry |                                                                                                                                                 |
|                                                         | Industrial     | Nonmanufacturing Sector       |                                                                                                                                                 |
|                                                         | Industrial     | Other Manufacturing Industry  |                                                                                                                                                 |
| Industrial, CCS implementation                          | Industrial     | Bulk Chemical Industry        | Implementing fraction of CO2 reduction through carbon capture and sequestration for certain sub-sectors of the industrial sector                |
|                                                         | Industrial     | Cement and Lime Industry      |                                                                                                                                                 |
|                                                         | Industrial     | Refining Industry             |                                                                                                                                                 |
| Iron and Steel Industry, efficiency                     | Industrial     | Iron and Steel                | Improvement in energy                                                                                                                           |

|                                                                   |                |                               |                                                                                                                                                                                                         |
|-------------------------------------------------------------------|----------------|-------------------------------|---------------------------------------------------------------------------------------------------------------------------------------------------------------------------------------------------------|
| improvements                                                      |                | Industry                      | efficiency over time in the iron and steel industry                                                                                                                                                     |
| Iron and Steel Industry, fuel switching Fossil H2 to renewable H2 | Industrial     | Iron and Steel Industry       | Implementing fuel switching of converting fraction of conventional H2 to renewable H2 for the iron and steel industry                                                                                   |
| Iron and Steel Industry, fuel switching Natural Gas to Hydrogen   | Industrial     | Iron and Steel Industry       | Fraction of natural gas used in the iron and steel industry is now replaced with H2 use                                                                                                                 |
| LULUCF: Sustainable Farming                                       | LULUCF         | Cropland remaining cropland   | Improving carbon sequestration by croplands and forests by sustainable implementing several sustainable farming practices                                                                               |
| Manure Management, linear reduction                               | Agriculture    | Manure Management             | Linear reduction of N2O emissions in agriculture by improvement manure application techniques and management                                                                                            |
| NREL Electric Power Decarb                                        | Agriculture    | -                             | Transformation of using conventional electricity generation feedstocks towards renewable and low-carbon alternative feedstocks for the electrical grid, across all economic sectors needing electricity |
|                                                                   | Commercial     | -                             |                                                                                                                                                                                                         |
|                                                                   | Industrial     | Aluminum Industry             |                                                                                                                                                                                                         |
|                                                                   | Industrial     | Bulk Chemical Industry        |                                                                                                                                                                                                         |
|                                                                   | Industrial     | Cement and Lime Industry      |                                                                                                                                                                                                         |
|                                                                   | Industrial     | Food Industry                 |                                                                                                                                                                                                         |
|                                                                   | Industrial     | Glass Industry                |                                                                                                                                                                                                         |
|                                                                   | Industrial     | Iron and Steel Industry       |                                                                                                                                                                                                         |
|                                                                   | Industrial     | Metal Based Durables Industry |                                                                                                                                                                                                         |
|                                                                   | Industrial     | Nonmanufacturing Sector       |                                                                                                                                                                                                         |
|                                                                   | Industrial     | Other Manufacturing Industry  |                                                                                                                                                                                                         |
|                                                                   | Industrial     | Paper Industry                |                                                                                                                                                                                                         |
|                                                                   | Industrial     | Refining Industry             |                                                                                                                                                                                                         |
|                                                                   | Residential    | -                             |                                                                                                                                                                                                         |
|                                                                   | Transportation | On Road                       |                                                                                                                                                                                                         |
| Transportation                                                    | Rail           |                               |                                                                                                                                                                                                         |
| On-Farm Mitigation                                                | Agriculture    | -                             | Implementing on-farm mitigation to reduce CO2 emissions                                                                                                                                                 |
| Paper Industry, efficiency improvements                           | Industrial     | Paper Industry                | Improvement in energy efficiency over time in the commercial sector                                                                                                                                     |
| Paper Industry, fuel switching Fossil H2 to renewable H2          | Industrial     | Paper Industry                | Implementing fuel switching of converting fraction of                                                                                                                                                   |

|                                                              |                |                                       |                                                                                                                                                   |
|--------------------------------------------------------------|----------------|---------------------------------------|---------------------------------------------------------------------------------------------------------------------------------------------------|
|                                                              |                |                                       | conventional H2 to renewable H2 for the paper industry                                                                                            |
| Paper Industry, fuel switching Natural Gas to Electricity    | Industrial     | Paper Industry                        | Fractional change in natural gas use replace with electricity                                                                                     |
| Paper Industry, fuel switching Natural Gas to Hydrogen       | Industrial     | Paper Industry                        | Fraction of natural gas used in the paper industry is now replaced with H2 use                                                                    |
| Paper Industry, fuel switching Steam Coal to Electricity     | Industrial     | Paper Industry                        | Implement fuel switching of converting fraction of steam coal to natural gas for paper industry                                                   |
| Reduction in Fugitive Methane emissions from Abandoned Wells | Industrial     | Abandoned Oil and Gas Wells           | Fractional reduction of methane emissions through implementation of mitigation measures at the abandoned wells                                    |
| Reduction in Fugitive Methane emissions from O&G             | Industrial     | Natural Gas Systems                   | Fractional reduction of methane emissions at oil and gas industries                                                                               |
|                                                              | Industrial     | Petroleum Systems                     |                                                                                                                                                   |
| Refinery Industry, fuel switching Natural Gas to Hydrogen    | Industrial     | Refining Industry                     | Fraction of natural gas used in the refinery industry is now replaced with H2 use                                                                 |
| Refining Industry, efficiency improvements                   | Industrial     | Refining Industry                     | Fractional improvement in energy efficiency for the refining industry                                                                             |
| Refining Industry, fuel switching Fossil H2 to renewable H2  | Industrial     | Refining Industry                     | Implementing fuel switching of converting fraction of conventional H2 to renewable H2 for the refining industry                                   |
| Residential: Energy efficiency                               | Residential    | -                                     | Improvement in energy efficiency over time in the residential sector                                                                              |
| Residential: Energy efficiency of Fuel switching             | Residential    | -                                     | Improvement of efficiency in existing technologies over time in the residential sector                                                            |
| Residential: Fuel switching                                  | Residential    | -                                     | Improvement in the energy and GHG emissions performance of the residential sector due to fuel switching mitigation implementation                 |
| Rice Cultivation, linear reduction                           | Agriculture    | Rice Cultivation                      | Implementing mitigation measures in rice cultivation to obtain linear reduction in carbon emissions through improved water and residue management |
| Soil N2O emissions, linear reduction                         | Agriculture    | N2O from Agricultural Soil Management | Implementation of mitigation measures to reduce soil N2O emissions from agricultural soil                                                         |
| Transportation, VISION scenarios                             | Transportation | On Road                               | Improvement of GHG emissions from the transportation industry                                                                                     |

|  |  |  |                                                       |
|--|--|--|-------------------------------------------------------|
|  |  |  | through implementation of several mitigation measures |
|--|--|--|-------------------------------------------------------|

**Table SI-7:** List of input parameters for the Decarbonization Model

| Parameter Name              | Description                                                                                                     | Value          |
|-----------------------------|-----------------------------------------------------------------------------------------------------------------|----------------|
| LCIA_Method                 | Specifying the GWP factor calculation methodology                                                               | AR4            |
| lcia_timeframe              | Specifying the GWP calculation timeframe                                                                        | 100            |
| EIA_AEO_case_option         | EIA AEO data projection case declaration                                                                        | Reference case |
| D2E_mtg_2050                | Targeted diesel to electricity use ratio                                                                        | 1.0            |
| D2E_relative_eff            | Relative efficiency of directly using diesel compared to directly using electricity in machineries              | =0.4/0.9       |
| manure_mgmt                 | Target of reducing GHG emissions from manure management activities                                              | 1.0            |
| soil_N2O                    | Target percentage of reducing N2O emissions from soil based on precision farming activities                     | 1.0            |
| rice_cultv                  | Target percentage of reducing GHG emissions from rice cultivation through improved water and residue management | 1.0            |
| mtg_paper                   | Target efficiency improvement across all activities of the paper industry                                       | 0.32           |
| mtg_food                    | Target efficiency improvement across all activities of the food industry                                        | 0.37           |
| mtg_bulk_chemicals          | Target efficiency improvement across all activities of the bulk chemicals industry                              | 0.13           |
| mtg_clinker_new_tech        | Target technological improvement across all activities of the cement industry                                   | 0.30           |
| mtg_cement_lime             | Target efficiency improvement across all activities of the cement and lime industry                             | 0.10           |
| mtg_refinery                | Target efficiency improvement of the lime industry                                                              | 0.13           |
| mtg_ironandsteel            | Target efficiency improvement of activities of the iron and steel industry                                      | 0.13           |
| mtg_NG_to_H2                | Target switching ratio from natural gas use to conventional H2 use                                              | 0.3            |
| mtg_NG_to_H2_refineries     | Target switching of natural gas use to H2 use in the refineries industry                                        | 0.7            |
| mtg_NG_to_H2_ironandsteel   | Target switching of natural gas to H2 in the iron and steel industry                                            | 0.3            |
| mtg_fossilH2_to_renewableH2 | Target switching of fossil H2 to                                                                                | 1.0            |

|                                  |                                                                                    |       |
|----------------------------------|------------------------------------------------------------------------------------|-------|
|                                  | renewable H2                                                                       |       |
| ammonia_ng_frac_for_heatandpower | Fraction of natural gas used for heat and power, in the ammonia producing industry | 0.283 |

**Figure SI-1:** A simplified model flow diagram representing the Python model scripts for implementing BAU and reference case calculations. The **main\_2.py** script acts as the primary execution script, while supportive scripts are called. The TO\_dashboard.py script is stand-alone script that's run to write model output data to the Excel dashboard.

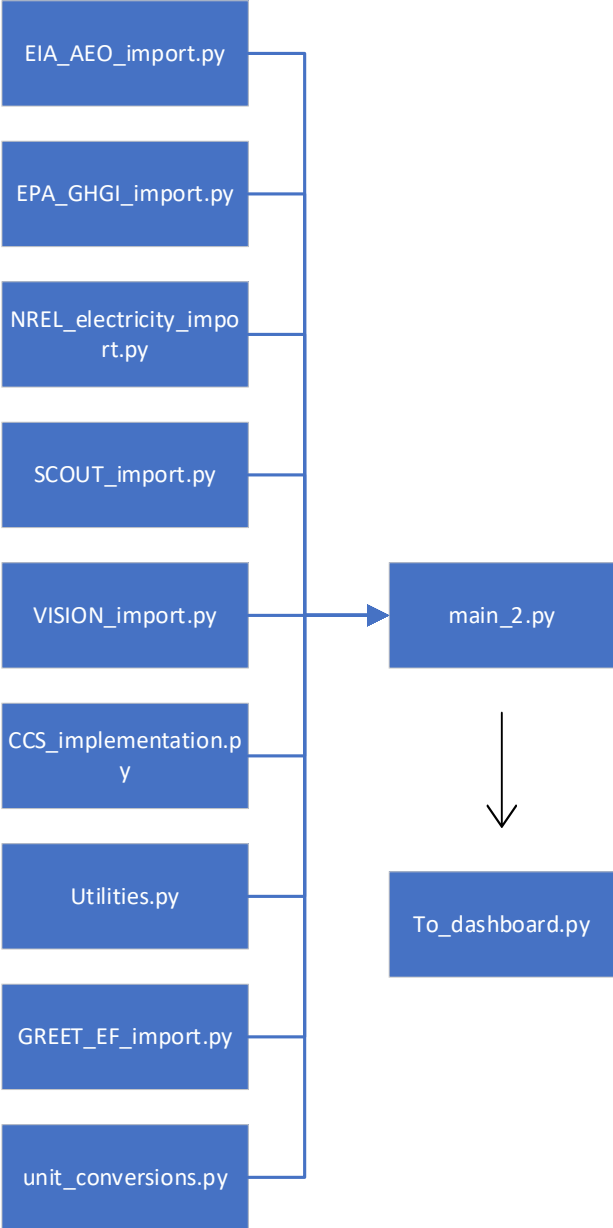

Supplement: d3se00807j1.pdf [file d3se00807j1.pdf]
